# Supplementary material for: Lack of the Delta Subunit of RNA Polymerase Increases Virulence Related Traits of Streptococcus mutans
Source: PLOS journal article supplement (doi:10.1371/journal.pone.0020075), 2011-05-19
Supplement: S1 (10.1371/journal.pone.0020075.s001) [file journal.pone.0020075.s001]

# PM Procedures for *E. faecalis* and other Lactic Acid Bacteria

## SECTION I: MATERIALS

### Section A. List of Equipment, Chemicals and Materials

**Table 1. Equipment**

| Equipment             | Source | Catalog #           |
|-----------------------|--------|---------------------|
| OmniLog PM System     | Biolog | 93171, 93182, 93184 |
| Turbidimeter          | Biolog | 3531, 3532, 3585    |
| Multichannel Pipetter | Biolog | 3501A, 3505A and B  |

**Table 2. Chemicals and Materials for Inoculation Procedure**

| Chemicals and Materials                                    | Source                   | Catalog #                                                                         |
|------------------------------------------------------------|--------------------------|-----------------------------------------------------------------------------------|
| PM panels 1-20                                             | Biolog                   | 12111, 12112, 12121, 12131, 12141, 12181, 12182, 12183, 12161, 12162, 12211-12220 |
| IF-0a GN/GP Base inoculating fluid (1.2x)                  | Biolog                   | 72268                                                                             |
| IF-10b GN/GP Base inoculating fluid (1.2x)                 | Biolog                   | 72266                                                                             |
| Biolog Redox Dye Mix F (100x)                              | Biolog                   | 74226                                                                             |
| Biolog Redox Dye Mix G (100x)                              | Biolog                   | 74227                                                                             |
| Biolog Redox Dye Mix H (100x)                              | Biolog                   | 74228                                                                             |
| BUG+B agar plates                                          | Biolog                   | 71102                                                                             |
| turbidity standard, 85% T                                  | Biolog                   | 3431                                                                              |
| sterile cotton swabs                                       | Biolog                   | 3021                                                                              |
| sterile pipet tips                                         | Biolog                   | 3001                                                                              |
| sterile reservoirs                                         | Biolog                   | 3102                                                                              |
| sterile 20 x 150 test tubes                                | E+K Scientific           | 266B                                                                              |
| sterile 120 ml plastic vial                                | Capitol Vial Corp.       | 1-24-786                                                                          |
| sealing tape for microplates (optional)                    | Phenix Research Products | LMT-SEAL-EX                                                                       |
| tricarballic acid                                          | Sigma                    | T9251                                                                             |
| magnesium chloride (MgCl <sub>2</sub> , 6H <sub>2</sub> O) | Sigma                    | M0250                                                                             |
| calcium chloride (CaCl <sub>2</sub> , 2H <sub>2</sub> O)   | Sigma                    | C3881                                                                             |
| L-arginine, HCl                                            | Sigma                    | A5131                                                                             |
| L-glutamate, Na                                            | Sigma                    | G1626                                                                             |
| L-cystine                                                  | Sigma                    | C8755                                                                             |
| uridine-5'-monophosphate (5'-UMP), 2Na                     | Sigma                    | U6375                                                                             |
| hypoxanthine                                               | Sigma                    | H9377                                                                             |
| β-NAD, hydrate                                             | Sigma                    | N7004                                                                             |
| riboflavin                                                 | Sigma                    | R4500                                                                             |
| yeast extract                                              | Oxoid                    | L21                                                                               |
| tween 40                                                   | Sigma                    | P1504                                                                             |
| tween 80                                                   | Sigma                    | P1754                                                                             |
| D-glucose                                                  | Sigma                    | G8270                                                                             |
| pyruvate, Na                                               | Sigma                    | P2256                                                                             |

**Table 3. Composition and Preparation of 12x PM Additive Solutions**

Prepare all 120x stock solutions, filter sterilize, and store at 4° C. Combine ingredients and Q.S. to 100 ml. Store at 4° C.

| <b>Ingredient</b>                      | <b>1x Conc.</b> | <b>40-120x Conc.</b> | <b>Formula Weight</b> | <b>Grams/ 100 ml</b> | <b>PM 1,2</b> | <b>PM 3,6,7,8</b> | <b>PM 4</b> | <b>PM 5</b> | <b>PM 9+</b> |
|----------------------------------------|-----------------|----------------------|-----------------------|----------------------|---------------|-------------------|-------------|-------------|--------------|
| tricarballic acid, pH 5.5 <sup>a</sup> | 20mM            | 800mM                | 176.1                 | 14.088               | -             | 30ml              | 30ml        | 30ml        | -            |
| MgCl <sub>2</sub> , 6H <sub>2</sub> O  | 2mM             | 240mM                | 203.3                 | 4.88                 | 10ml          | 10ml              | 10ml        | 10ml        | 10ml         |
| CaCl <sub>2</sub> , 2H <sub>2</sub> O  | 1mM             | 120mM                | 147.0                 | 1.76                 |               |                   |             |             |              |
| L-glutamate, Na                        | 50uM            | 6mM                  | 169.1                 | 0.101                | 10ml          | -                 | 10ml        | -           | -            |
| L-cystine pH8.5 <sup>b</sup>           | 12.5uM          | 0.5mM                | 240.3                 | 0.012                | 30ml          | 30ml              | -           | -           | -            |
| 5'-UMP, 2Na                            | 25uM            | 1mM                  | 368.1                 | 0.037                |               |                   |             |             |              |
| L-arginine, HCl                        | 25uM            | 3mM                  | 210.7                 | 0.063                |               |                   |             |             |              |
| hypoxanthine                           | 25uM            | 3mM                  | 136.1                 | 0.041                |               |                   |             |             |              |
| β-NAD, hydrate                         | 5uM             | 0.6mM                | 663.4                 | 0.040                | 10ml          | 10ml              | 10ml        | -           | 10ml         |
| riboflavin                             | 0.25uM          | 30uM                 | 376.4                 | 0.0011               |               |                   |             |             |              |
| yeast extract                          | 0.005%          | 0.6%                 | -                     | 0.6                  |               |                   |             |             |              |
| tween 80 <sup>c</sup>                  | 0.005%          | 0.6%                 | -                     | 0.6                  |               |                   |             |             |              |
| D-glucose                              | 2.5mM           | 300mM                | 180.2                 | 5.40                 | -             | 10ml              | 10ml        | 10ml        | 10ml         |
| pyruvate, Na <sup>d</sup>              | 5mM             | 600mM                | 110.0                 | 6.6                  |               |                   |             |             |              |
| sterile water                          |                 |                      |                       |                      | 40ml          | 10ml              | 30ml        | 50ml        | 70ml         |
| Total                                  |                 |                      |                       |                      | 100ml         | 100ml             | 100ml       | 100ml       | 100ml        |

<sup>a</sup>Prepare by adding 14.088g to 55ml of water and then adjust pH to 5.5 with NaOH. Dissolve with stirring and check the pH on the meter and with pH paper. Then Q.S. the final volume to 100ml.

<sup>b</sup>Adjust pH to 8.5 with NaOH and check with pH paper. Check the pH on the meter and with pH paper. Then add the 5'UMP and Q.S. the final volume to 100ml.

<sup>c</sup>Tween 80 is recommended *Enterococcus faecalis*. Some other species may prefer tween 40.

<sup>d</sup>If the A-1 well in PM3-8 is too false positive, the concentration of the glucose/pyruvate can be decreased to one half or one quarter of this concentration. Alternatively, the pH of the tricarballic acid buffer can be lowered a little, for example to pH 5.0. If there are no reactions in PM3-8, the pH of the tricarballic acid buffer can be raised, for example to 6.0, 6.5, or 7.0.

**Table 4. Recipe for 1x PM Inoculating Fluids from Stock Solutions**

| <b>PM Stock Solution</b>                 | <b>PM1,2<br/>(ml)</b> | <b>PM3,6,7,<br/>8 (ml)</b> | <b>PM4<br/>(ml)</b> | <b>PM5<br/>(ml)</b> | <b>PM9+<br/>(ml)</b> |
|------------------------------------------|-----------------------|----------------------------|---------------------|---------------------|----------------------|
| IF-0a GN/GP (1.2x)                       | 20.0                  | 40.0                       | 10.0                | 10.0                | -                    |
| IF-10b GP/GP (1.2x)                      | -                     | -                          | -                   | -                   | 110.0                |
| Dye mix F, G or H <sup>e</sup><br>(100x) | 0.24                  | 0.48                       | 0.12                | 0.12                | 1.32                 |
| PM additive (12x)                        | 2.0                   | 4.0                        | 1.0                 | 1.0                 | 11.0                 |
| Sterile water                            | -                     | -                          | -                   | -                   | -                    |
| cells (13.64x)                           | 1.76                  | 3.52                       | 0.88                | 0.88                | 9.68                 |
| Total                                    | 24.0                  | 48.0                       | 12.0                | 12.0                | 132.0                |

<sup>e</sup>Dye mix H is recommended for *Enterococcus faecalis*. In general, Dye mix F or H is used for fast growing GP genera (*Listeria*, *Enterococcus*) and Dye Mix G is used for slow growing GP genera (*Streptococcus*, *Lactococcus*, *Lactobacillus*).

## **SECTION II: PROCEDURES for PM Inoculation**

### ***Section A. Cell Suspension Preparation and PM Inoculation***

#### **Preparation of PM Inoculating Fluids**

1. Prepare a test tube containing 20 ml of 1x IF-0a.
2. Prepare inoculating fluids as specified in Tables 3 and 4.
3. Dispense inoculating fluids into tubes as diagrammed in Figure 1.

#### **Inoculation of PM Panels (see procedure diagrammed in Figure 1)**

##### **Step 1: Prepare Cell Suspension**

Grow the bacterium on a BUG+B agar plate by streaking for isolated colonies and allow it to grow overnight at 33 °C. Subculture a second time.

Remove cells from the BUG+B plate using a sterile swab and transfer into a sterile capped tube containing 20 ml of 1x IF-0a. Stir the cell suspension with the swab to obtain a uniform suspension. Do not vortex or mix turbulently.

Check the turbidity of the suspension; add cells to achieve 81% T (transmittance).

##### **Step 2: Inoculate PM 1,2**

Add 1.76 ml of cell suspension to 22.24 ml of PM1,2 inoculating fluid.

Inoculate PM 1 and PM 2 with this cell suspension, 100 ul / well.

##### **Step 3: For PM 3, 6, 7 and 8**

Add 3.52 ml of cell suspension to 44.48 ml of PM3,6,7,8 inoculating fluid.

Inoculate PM 3, 6, 7 and 8 with this cell suspension, 100 ul / well.

##### **Step 4: For PM 4**

Add 0.88 ml of cell suspension to 11.12 ml of PM4 inoculating fluid.

Inoculate PM 4 with this cell suspension, 100 ul / well.

##### **Step 5: For PM 5**

Add 0.88 ml of cell suspension to 11.12 ml of PM5 inoculating fluid.

Inoculate PM 5 with this cell suspension, 100 ul / well.

##### **Step 6: For PM 9+**

Add 9.68 ml of cell suspension to 122.32 ml of PM9+ inoculating fluid.

Inoculate PM 9-20 with this cell suspension, 100 ul / well.

**Figure 1. PM Procedures for *B. subtilis* and other GP Bacteria**

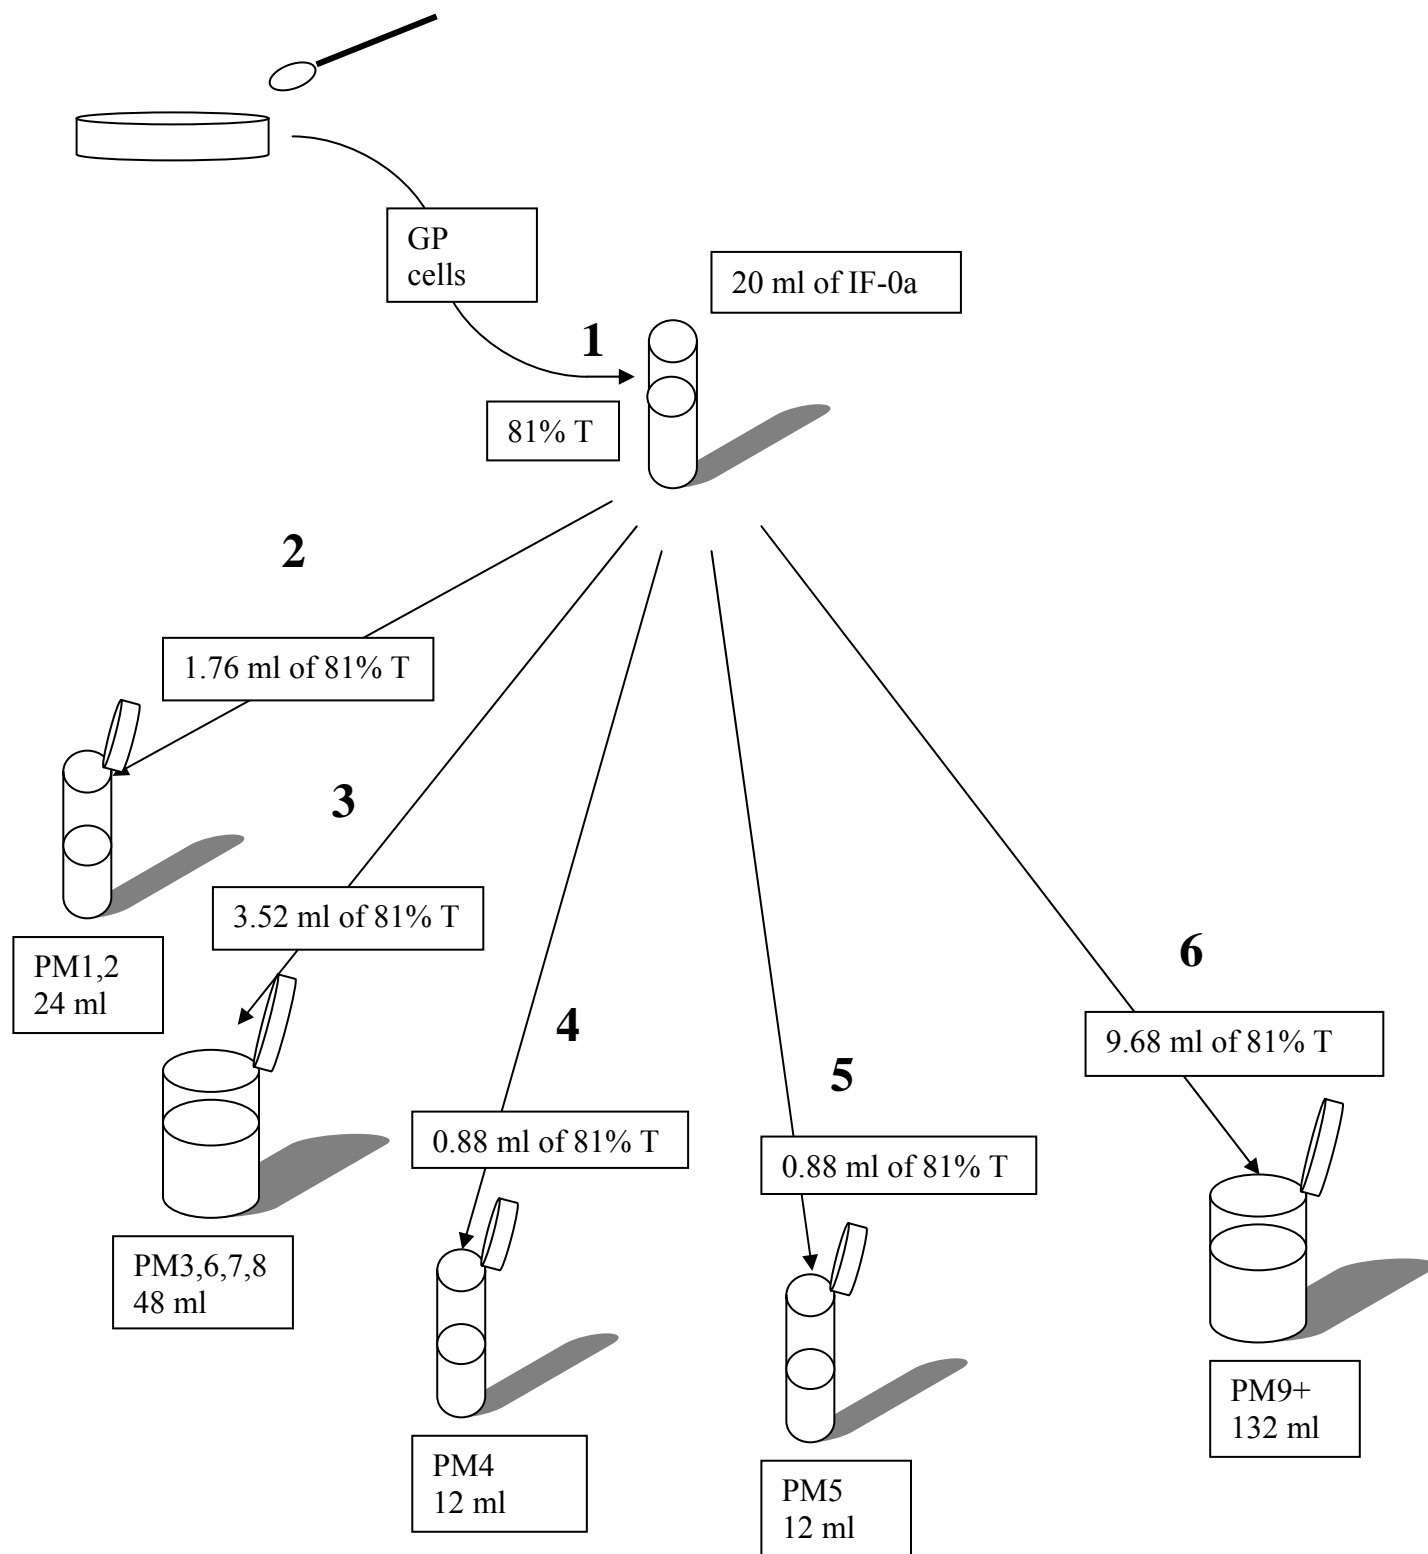

***Section B. Incubation and Data Collection***

1. Enter worksheet data into OmniLog Software.
2. Load the OmniLog.
3. Incubate all PMs in OmniLog at 30-37°C for 24-48 hours (e.g. 33°C, 36 hr).
4. Remove plates from OmniLog and store at 4°C.
5. Collect the data for analysis.
